1 **Bacterial Pneumonia and Respiratory Culture Utilization among Hospitalized Patients with and**  
2 **without COVID-19 in New York City**

3

4 Maxwell D. Weidmann, MD, PhD<sup>1</sup>, Gregory J. Berry, PhD<sup>1</sup>, Jason E. Zucker, MD<sup>2</sup>, Simian Huang<sup>2</sup>,  
5 Magdalena E. Sobieszczyk, MD<sup>2</sup>, and Daniel A. Green, MD<sup>1</sup>

6

7 <sup>1</sup>Department of Pathology & Cell Biology, Columbia University Irving Medical Center, New York, NY

8 <sup>2</sup>Division of Infectious Diseases, Department of Internal Medicine, Columbia University Irving Medical  
9 Center, New York, NY

10

11 Keywords: COVID-19, SARS-CoV-2, Pneumonia, Co-infection, Respiratory Culture

12 Running Title: Respiratory Culture COVID-19

13

14 #Address correspondence to:

15 Daniel A. Green, M.D., Ph.D.

16 Assistant Professor of Pathology & Cell Biology

17 Columbia University Irving Medical Center

18 3959 Broadway, CHC 3-324

19 New York, NY 10032

20 (212)-305-6301

21 dag2149@cumc.columbia.edu

22

23

24

25

26 **Abstract**

27 COVID-19 is associated with prolonged hospitalization and a high risk of intubation, which raises  
28 concern for bacterial co-infection and antimicrobial resistance. Previous research has shown a wide range  
29 of bacterial pneumonia rates for COVID-19 patients in a variety of clinical and demographic settings, but  
30 none have compared hospitalized COVID-19 patients to patients testing negative for SARS-CoV-2 in  
31 similar care settings. We performed a retrospective cohort study on hospitalized patients with COVID-19  
32 testing from 10 March 2020 to 31 December 2020. A total of 19,219 patients were included, of which  
33 3,796 tested positive for SARS-CoV-2. We found a 2.6-fold increase ( $p < 0.001$ ) in respiratory culture  
34 ordering in COVID-19 patients. On a per-patient basis, COVID-19 patients were 1.5-fold more likely  
35 than non-COVID patients to have abnormal respiratory cultures (46.8% vs. 30.9%,  $p < 0.001$ ), which was  
36 primarily driven by patients requiring intubation. Among patients with pneumonia, a significantly higher  
37 proportion of COVID-19 patients had ventilator-associated pneumonia (VAP) relative to non-COVID  
38 patients (85.7% vs 55.1%,  $p < 0.001$ ), but a lower proportion had community-acquired (12.2% vs 22.1%,  $p$   
39  $< 0.01$ ) or hospital-acquired pneumonia (2.1% vs. 22.8%,  $p < 0.001$ ). There was also a significantly  
40 higher proportion of respiratory cultures positive for MRSA, *K. pneumoniae*, and antibiotic-resistant  
41 organisms in COVID-19 patients. Increased rates of respiratory culture ordering for COVID-19 patients  
42 therefore appear to be clinically justified for patients requiring intubation, but further research is needed  
43 to understand how SARS-CoV-2 increases the risk of VAP.

44

45

46

47

48

49

## 50 **Introduction**

51 Concern for bacterial co-infection among COVID-19 patients resulted in empirical antimicrobial  
52 therapy given to a large proportion of patients hospitalized at our medical center during 2020 [1]. While a  
53 relatively high rate of bacterial and influenza co-infection has characterized hospitalized influenza  
54 patients, with estimates ranging from 11% to 35% [2, 3], less is known about the rate of bacterial  
55 pneumonia in hospitalized COVID-19 patients. Further, in influenza, bacterial co-infection has been  
56 found to be more frequently of community-origin, with one study of hospitalized adults in the US finding  
57 that more than 54% of co-infections in adults were diagnosed within the first 48 hours of hospitalization  
58 [3]. Several studies have examined bacterial co-infection for COVID-19 patients in inpatient and ICU  
59 settings, generally finding lower rates than for influenza patients [4-7]. Of the two largest such studies,  
60 one found very low rates of community-acquired pneumonia (CAP) (1.5%) [7], while the other found an  
61 overall bacterial pneumonia rate of 2.1%, with the overwhelming majority being HAP or VAP [6, 8]. One  
62 study among ICU patients found much higher rates of patients with abnormal respiratory cultures (28%),  
63 however 90% of these patients required mechanical ventilation [9].

64 Therefore, when all hospitalized patients are considered together, rates of bacterial pneumonia  
65 appear lower in COVID-19 patients relative to hospitalized influenza patients, and in contrast to  
66 influenza, few of these infections are community-acquired. However, none of these studies have assessed  
67 the concurrent rate of bacterial co-infections, including HAP and VAP rates, in patients testing negative  
68 for SARS-CoV-2 during the same period. This lack of a direct comparison between COVID-19 and non-  
69 COVID-19 infected patients makes it difficult to determine whether the highly disparate reported rates of  
70 bacterial co-infection represent the heterogeneity of the patient populations studied, or a truly elevated  
71 risk of bacterial pneumonia associated with SARS-CoV-2 infection.

72 Additionally, respiratory culture utilization among COVID-19 patients has not been previously  
73 studied. Understanding the rates of respiratory culture ordering and positivity among COVID-19 patients  
74 is needed to determine whether culture ordering is appropriate among hospitalized COVID-19 patients,

75 and to understand the risk of HAP and VAP in this population. To study this further, we compared rates  
76 of bacterial pneumonia, respiratory culture ordering, bacterial etiologies, and antibiotic resistance between  
77 patients testing positive and negative for COVID-19 in the same hospital setting.

## 78 **Materials and Methods**

79 A retrospective cohort study was conducted on all hospitalized patients with SARS-CoV-2 testing  
80 performed at Columbia University Irving Medical Center (CUIMC) located in New York City from 10  
81 March 2020 to 31 December 2020. SARS-CoV-2 RT-PCR testing was performed in-house using the  
82 following assays: Cobas SARS-CoV-2 (Roche Molecular Systems, Inc., Branchburg, NJ), Xpert Xpress  
83 SARS-CoV-2 (Cepheid, Sunnyvale, CA), and a laboratory-developed test from the Wadsworth Center at  
84 the New York State Department of Health.

85 Data were extracted from medical records to compare respiratory culture utilization and culture  
86 results between COVID-19 and non-COVID patients; these data included time of SARS-CoV-2 testing,  
87 SARS-CoV-2 test results, dates of admission and discharge, intubation status, number of respiratory  
88 cultures performed, time of respiratory culture orders, and results of respiratory culture testing, including  
89 time of culture results, bacterial species recovered, and antimicrobial susceptibility.

90 Rates of respiratory culture utilization and culture positivity were compared between COVID-19 and  
91 non-COVID patients, as was the distribution of recovered species, antimicrobial susceptibility profiles,  
92 intubation status and ordering time of positive cultures during hospital admission to stratify pneumonia  
93 cases into community-acquired ( $\leq 2$  days) vs. hospital-acquired ( $> 2$  days) vs ventilator-associated ( $>2$   
94 days after intubation) [8]. A positive respiratory culture was defined as any potential respiratory pathogen  
95 recovered from culture, whereas a negative result was defined as either no growth, when cultures were  
96 resulted as “mixed commensal microbiota,” or when only yeast were isolated. Respiratory cultures were  
97 excluded if SARS-CoV-2 testing was performed after respiratory cultures were ordered to ensure that all  
98 culture results analyzed were from patients of known COVID-19 status at time of testing.

99 Chi-squared testing was used to identify statistically significant differences in rates of respiratory  
100 culture ordering, positivity, antibiotic resistance, and CAP, HAP or VAP in COVID-19 positive and  
101 negative patients. A two-tailed Student's t-test was used to assess statistical significance in time to  
102 respiratory culture positivity (when results of continuous variables were being compared). Data analysis  
103 was initially performed using Microsoft Excel, with statistical tests performed using R and R-Studio for  
104 reproducibility with scripts included in supplemental data.

105

## 106 **Results**

### 107 *Demographics of SARS-CoV-2 positive and negative populations*

108 A total of 19,275 participants were initially included; 3,805 (19.7%) tested positive for SARS-CoV-2  
109 and 15,470 (80.3%) tested negative. 56 patients were excluded due to respiratory cultures ordered prior to  
110 SARS-CoV-2 testing, leaving 19,219 participants for study analysis. SARS-CoV-2 positivity rates varied  
111 widely over the study period, from a peak of nearly 60% in April 2020 to a low of just over 3% in  
112 September 2020 (**Supplemental Figure 1**). Demographic characteristics of included patients are  
113 shown in **Table 1**. Compared to non-COVID patients, COVID-19 patients were older ( $p <$   
114  $0.001$ ), more likely to be male ( $p < 0.001$ ), more likely to be Hispanic/Latino, less likely to be  
115 white, and were more likely to receive care in the ICU ( $p < 0.001$ ). The mortality rate was also  
116 5.6-fold higher (16.9% vs. 3.0%,  $p < 0.001$ ) and intubation rate 2.9-fold higher (16.6 vs. 5.7,  $p <$   
117  $0.001$ ) for COVID-19 patients.

118

### 119 *Increased rates of respiratory culture ordering in COVID-19 patients*

120 COVID-19 patients were 2.6 times as likely to have respiratory cultures ordered compared to non-  
121 COVID patients (16.0 % vs 6.2%,  $p < 0.001$ , **Table 2**). Although the rate of respiratory culture ordering  
122 varied by month (**Figure 1A**), significantly higher ordering was seen among COVID-19 patients across

123 all months except July 2020. Increased ordering was also reflected in a higher number of cultures ordered  
124 per patient for COVID-19 patients relative to non-COVID patients (4.3 vs 2.7 per patient,  $p < 0.001$ ,  
125 **Figure 1B**).

126 A much higher rate of respiratory culture ordering was seen overall among intubated patients  
127 (57.5%) vs non-intubated patients (4.4%). Among intubated patients, however, ordering was still  
128 significantly higher for those with COVID-19 compared to non-COVID patients (71.5% vs. 47.4%,  $p <$   
129  $0.001$ , **Table 2, Supplementary Figure 2**). In addition, among patients who did not require intubation,  
130 there was also a significantly higher rate of respiratory culture ordering for COVID-19 relative to non-  
131 COVID patients (6.1 vs 4.1%,  $p < 0.001$ , **Supplementary Figure 2D & Table 2**).

132

133 *Higher likelihood of respiratory culture positivity among intubated COVID-19 patients.*

134 Overall, 7.6% of COVID-19 patients had positive respiratory cultures vs. 1.8% for non-COVID  
135 patients (**Figure 2, Table 3**). Among patients who had respiratory cultures ordered, COVID-19 patients  
136 were also more likely than non-COVID patients to have an abnormal culture (46.8% vs 30.9%,  $p <$   
137  $0.001$ ). Even accounting for the higher rate of respiratory culture ordering among COVID-19 patients, on  
138 a per culture basis, COVID-19 patients still had a higher percentage of positive cultures (33.4% vs 26.9%,  
139  $p < 0.001$ , **Table 3**).

140 The higher rate of abnormal cultures among COVID-19 patients was primarily driven by patients  
141 requiring intubation. A total of 26.7% of all intubated patients had abnormal respiratory cultures collected  
142 more than 48 hours after intubation, qualifying as ventilator-associated pneumonia (VAP). Amongst  
143 intubated patients, VAP was more than twice as likely in COVID-19 patients relative to non-COVID  
144 patients (39.0% vs. 17.9%,  $p < 0.001$ , **Supplementary Figure 2E, Table 3**). When looking at only  
145 intubated patients who had respiratory cultures ordered, there remained a significantly higher proportion  
146 of COVID-19 positive patients with VAP compared to non-COVID patients (62.0% vs. 51.5%,  $p < 0.01$ ,  
147 **Supplementary Figure 2E, Table 3**) However, among non-intubated patients, there were no significant

148 differences by COVID-19 status in the proportion of patients with respiratory cultures ordered that  
149 resulted as abnormal or the proportion of total patients with abnormal respiratory culture results  
150 (**Supplementary Figure 2E-F, Table 3**).

151 Among culture-positive patients, COVID-19 patients had a significantly lower rate of CAP, defined  
152 as abnormal cultures within the first two days of admission, compared to non-COVID patients (12.2% vs  
153 22.1%,  $p < 0.01$ , **Figure 3, Table 4**). Conversely a significantly higher proportion of pneumonia cases  
154 also occurred at least two days after admission for COVID-19 positive patients relative to non-COVID  
155 patients (**Figure 3**), and this difference was particularly pronounced in patients with positive cultures at  
156 least 10 days after admission (64.8% vs. 42.1%,  $p < 0.001$ ). When we looked specifically at HAP, defined  
157 as abnormal respiratory cultures that resulted more than two days after admission but not in patients who  
158 had been ventilated for more than two days, we found a significantly lower rate among COVID-19  
159 patients relative to non-COVID patients (2.1% vs. 22.8%,  $p < 0.001$ , **Figure 3, Table 4**). The  
160 overwhelming majority (85.7%) of bacterial pneumonia cases among COVID-19 patients were ventilator-  
161 associated, and this was significantly higher than the rate of VAP in non-COVID patients with bacterial  
162 pneumonia (55.1%,  $p < 0.001$ , **Figure 3, Table 4**).

163

#### 164 *Bacterial etiologies of positive respiratory cultures*

165 Respiratory cultures grew a wide range of bacterial pathogens in our patient population  
166 (**Supplementary Table 1**). The most common organism overall was *P. aeruginosa* (**Figure 4**). For  
167 COVID-19 patients, the most common organisms in descending order were *S. aureus*, *P. aeruginosa* and  
168 *K. pneumoniae*. For non-COVID patients, the most common organisms in descending order were *P.*  
169 *aeruginosa*, *S. aureus* and *K. Pneumoniae* (**Figure 4**). Among patients with abnormal respiratory cultures,  
170 methicillin-resistant *S. aureus* infections (MRSA) were more common for COVID-19 patients (8.9% vs.  
171 5.4%,  $p < 0.05$ , **Figure 4**), and there was a significant increase in the proportion of overall COVID-19  
172 positive vs. negative patients with MRSA respiratory infections (1.05% vs. 0.15%,  $p < 0.001$ ). There was

173 also a significantly higher proportion of COVID-19 patients whose cultures grew *K. pneumoniae* (26.1%  
174 vs. 16.3%,  $p < 0.01$ , **Figure 4**).

175

### 176 *Antibiotic resistance in COVID-19 bacterial pneumonia*

177 In agreement with our finding of increased rates of MRSA-positive respiratory cultures in COVID-  
178 19 patients, we found increased rates of resistance to penicillin class antibiotics (penicillin, ampicillin,  
179 oxacillin), 63.4 vs. 50.1% of COVID-19 positive vs. negative patients who had an abnormal culture result  
180 ( $p < 0.05$ , **Supplemental Figure 3**). Rates of penicillin-class resistance amongst gram-positive organisms  
181 were higher amongst COVID-19 patients (51.8 vs. 40.7%), but this difference was not significant.  
182 Relative to non-COVID patients, COVID-19 patients showed no significant increases in rates of  
183 Enterbacterales resistant to 3<sup>rd</sup>-generation cephalosporins, carbapenem-resistant Enterobacterales, and  
184 carbapenem-resistant *P. aeruginosa* or *A. baumannii*.

### 185 **Discussion**

186 During the first 10 months of the COVID-19 pandemic we found significantly higher utilization of  
187 respiratory cultures for COVID-19 patients compared to non-COVID patients at our NYC medical center.  
188 Yet despite the increased ordering, intubated COVID-19 patients still had a higher percentage of  
189 abnormal respiratory cultures than intubated non-COVID patients, suggesting that COVID-19 patients  
190 have an elevated risk for VAP. Bacterial pneumonia in COVID-19 patients was much more likely to be  
191 ventilator-associated and less likely to be community acquired when compared to non-COVID patients.  
192 When excluding intubated patients, rates of hospital-acquired pneumonia were lower among COVID-19  
193 relative to non-COVID patients. This study is the first to directly assess respiratory culture ordering and  
194 positivity in COVID-19 and non-COVID patients in the same hospital. Given the higher rate of positivity  
195 amongst intubated COVID-19 patients, respiratory culture ordering appears warranted for this subset of  
196 hospitalized COVID-19 patients in whom there is a higher suspicion for bacterial pneumonia.



197 While more than 80% of respiratory co-infections in COVID-19 patients occurred more than two  
198 days into hospitalization, and the majority of these occurred well into hospitalization (> 10 days), nearly  
199 all these cases qualified as VAP and were therefore attributable to intubation rather than other sources of  
200 hospital-acquired infection. Only 0.7% of non-intubated COVID-19 patients were found to have bacterial  
201 pneumonia, and when this was normalized to respiratory culture ordering, the rate was lower than that for  
202 non-intubated non-COVID patients. We also found similarly low rates of CAP in COVID-19 patients  
203 compared to what has previously been cited in the literature. A recent study of hospitalized COVID-19  
204 patients looking specifically at rates of bacterial co-infection within the first three days of hospitalization  
205 and finding 1.1% with probable infection, and additional 12.4% with possible co-infection, when all types  
206 of infection were considered [10]. Looking specifically at respiratory bacterial co-infections, our study  
207 found 1.2% of COVID-19 patients with positive cultures in the first three days of hospitalization, in  
208 contrast to 6.3% of COVID-19 patients with abnormal cultures representing HAP or VAP by this  
209 definition. The low rate of community-acquired respiratory infections we found here further supports  
210 these authors' conclusions that empiric antibiotic therapy for COVID-19 patients is generally not  
211 indicated during early hospitalization [10, 11]. Similarly, our finding that non-intubated patients had  
212 lower rates of bacterial pneumonia, when those rates were normalized by respiratory culture ordering,  
213 argues against routine respiratory culture and empiric pneumonia therapy in these patients. However, the  
214 relatively high rates of VAP that we found in COVID-19 patients supports a low threshold for respiratory  
215 culture ordering and initiation of antimicrobial therapy for intubated patients.

216 Abnormal respiratory cultures of COVID-19 patients were enriched for pathogens associated with  
217 hospital-acquired infection with a generally similar proportion non-COVID patients (**Figure 4**). However,  
218 there were significant increases in both *Klebsiella pneumoniae* and MRSA respiratory infections, which  
219 we interpreted as further corroborating an increased level of hospital-acquired infections for COVID-19  
220 positive patients, particularly relative to the total number of patients testing positive. Overall rates of  
221 resistance to penicillin-class antibiotics were significantly higher in respiratory isolates from COVID-19

222 positive patients, which corroborates data from other studies demonstrating high rates of MRSA and  
223 MDR bacterial infections in COVID-19 patients [6, 12]. One such study also showed that there were  
224 significant increases in antibiotic resistance by the duration of hospital stay, including rates of MRSA,  
225 vancomycin resistant Enterococcus (VRE), ceftriaxone-resistant Enterbacterales, carbapenem-resistant  
226 Enterobacterales and carbapenem-resistant *P. aeruginosa* or *A. baumannii* [12]. Interestingly, we did not  
227 find significant increase in resistance rates between COVID-19 positive and negative patients for  
228 ceftriaxone-resistant Enterbacterales, carbapenem-resistant Enterobacterales and carbapenem-resistant *P.*  
229 *aeruginosa* or *A. baumannii*. However, further study is necessary to understand the mechanism by which  
230 MRSA rates are increased by SARS-CoV-2 infection, and whether this is via direct effect of the virus on  
231 the host environment or indirectly through affecting host exposure to drug resistant pathogens.

232 Some limitations of this study include its representation of data from a single institution only. There  
233 were also significant baseline demographic differences in the COVID-19 positive and negative  
234 populations. Inadequate SARS-CoV-2 testing capacity also makes results from March of 2020 difficult to  
235 interpret, as false negative rates may have been increased in this setting. Prior to March 23<sup>rd</sup>, 2020, not all  
236 patients admitted to CUIMC were tested for SARS-CoV-2 due to limited capacity, and this population of  
237 unknown COVID-19 status was not included in our data. The data available did not include sensitivities  
238 for several antibiotic classes, such as fluoroquinolones, aminoglycosides and macrolides, that would have  
239 been helpful in a more comprehensive characterization of resistance in our population of patients with  
240 bacterial pneumonia. In addition, the data analyzed here represents one period early in the pandemic,  
241 during which time rates of COVID-19 varied greatly in the population (Supplemental Figure 1). The  
242 COVID-19 patient population represented here is largely composed of those infected during the initial  
243 surge of infections in NYC from March-May of 2020 and may not represent later stages of the pandemic  
244 during which different SARS-CoV-2 variants have become dominant.

245 In summary, the data presented here suggests that COVID-19 infection resulted in higher rates of  
246 bacterial co-infection relative to patients who tested negative during the same period, but that these

247 infections were seen in the setting of prolonged hospitalization and intubation, rather than increased rates  
248 of CAP as seen with other viruses such as influenza. Possible explanations for these findings include  
249 longer periods of hospitalization for COVID-19 patients, inadequate infection control practices during  
250 acute phases of the pandemic, or direct effects of SARS-CoV-2 itself on the pathogenesis of bacterial  
251 pneumonia during intubation. Based on these findings, respiratory culture ordering is indicated for  
252 COVID-19 patients with prolonged hospitalization and ventilator dependence. However, further study is  
253 necessary to understand why SARS-CoV-2 predisposes intubated patients to VAP.

254

## 255 **References**

- 256 1. Sepulveda, J., et al., *Bacteremia and Blood Culture Utilization during COVID-19 Surge in New*  
257 *York City*. J Clin Microbiol, 2020. **58**(8).
- 258 2. Klein, E.Y., et al., *The frequency of influenza and bacterial coinfection: a systematic review and*  
259 *meta-analysis*. Influenza Other Respir Viruses, 2016. **10**(5): p. 394-403.
- 260 3. Shah, N.S., et al., *Bacterial and viral co-infections complicating severe influenza: Incidence and*  
261 *impact among 507 U.S. patients, 2013-14*. J Clin Virol, 2016. **80**: p. 12-9.
- 262 4. Langford, B.J., et al., *Bacterial co-infection and secondary infection in patients with COVID-19: a*  
263 *living rapid review and meta-analysis*. Clin Microbiol Infect, 2020. **26**(12): p. 1622-1629.
- 264 5. Lansbury, L., et al., *Co-infections in people with COVID-19: a systematic review and meta-*  
265 *analysis*. J Infect, 2020. **81**(2): p. 266-275.
- 266 6. Nori, P., et al., *Bacterial and fungal coinfections in COVID-19 patients hospitalized during the*  
267 *New York City pandemic surge*. Infect Control Hosp Epidemiol, 2021. **42**(1): p. 84-88.
- 268 7. Vaughn, V.M., et al., *Empiric Antibacterial Therapy and Community-onset Bacterial Coinfection in*  
269 *Patients Hospitalized With Coronavirus Disease 2019 (COVID-19): A Multi-hospital Cohort Study*.  
270 Clin Infect Dis, 2021. **72**(10): p. e533-e541.
- 271 8. Kalil, A.C., et al., *Management of Adults With Hospital-acquired and Ventilator-associated*  
272 *Pneumonia: 2016 Clinical Practice Guidelines by the Infectious Diseases Society of America and*  
273 *the American Thoracic Society*. Clin Infect Dis, 2016. **63**(5): p. e61-e111.
- 274 9. Contou, D., et al., *Bacterial and viral co-infections in patients with severe SARS-CoV-2 pneumonia*  
275 *admitted to a French ICU*. Ann Intensive Care, 2020. **10**(1): p. 119.
- 276 10. Coenen, S., et al., *Low frequency of community-acquired bacterial co-infection in patients*  
277 *hospitalized for COVID-19 based on clinical, radiological and microbiological criteria: a*  
278 *retrospective cohort study*. Antimicrob Resist Infect Control, 2021. **10**(1): p. 155.
- 279 11. Wang, L., et al., *An observational cohort study of bacterial co-infection and implications for*  
280 *empirical antibiotic therapy in patients presenting with COVID-19 to hospitals in North West*  
281 *London*. J Antimicrob Chemother, 2021. **76**(3): p. 796-803.
- 282 12. Kubin, C.J., et al., *Characterization of Bacterial and Fungal Infections in Hospitalized Patients*  
283 *With Coronavirus Disease 2019 and Factors Associated With Health Care-Associated Infections*.  
284 Open Forum Infect Dis, 2021. **8**(6): p. ofab201.

285 **Tables:**

286 **Table 1: Demographics of SARS-CoV-2 Positive and Negative Patient Population.**

| <b>Category</b>     | <b>Sub-Category</b>    | <b>SARS-CoV-2 Positive</b> | <b>SARS-CoV-2 Negative</b> | <b>p-value</b> |
|---------------------|------------------------|----------------------------|----------------------------|----------------|
| <b>Age (years)</b>  | <u>Mean (±SD)</u>      | 62.0 ± 21.0                | 48.7 ± 26.4                | p < 1e-15      |
| <b>Sex</b>          | <u>Male</u>            | 54.0%                      | 43.2%                      | p < 1e-15      |
|                     | <u>Female</u>          | 46.0%                      | 56.8%                      |                |
| <b>Race</b>         | <u>White</u>           | 11.8%                      | 19.0%                      | p < 1e-15      |
|                     | <u>Black</u>           | 12.8%                      | 13.1%                      |                |
|                     | <u>Hispanic/Latino</u> | 51.9%                      | 39.6%                      |                |
|                     | <u>Other</u>           | 23.5%                      | 28.3%                      |                |
| <b>Care Setting</b> | <u>ED</u>              | <0.1%                      | <0.1%                      | p < 0.00001    |
|                     | <u>Admitted</u>        | 79.9%                      | 83.1%                      |                |
|                     | <u>ICU</u>             | 20.0%                      | 16.9%                      |                |
| <b>Mortality</b>    |                        | 16.9%                      | 3.0%                       | p < 1e-15      |
| <b>Intubation</b>   |                        | 16.6%                      | 5.7%                       | p < 1e-15      |

287

288 **Table 2: Respiratory Culture Ordering**

| <b>Metric</b>                                                   | <b>Total</b> | <b>SARS-CoV-2 Positive</b> | <b>SARS-CoV-2 Negative</b> | <b>p-value</b> |
|-----------------------------------------------------------------|--------------|----------------------------|----------------------------|----------------|
| <b>Total Patients</b>                                           | 19219        | 3796                       | 15423                      |                |
| <b>Total cultures ordered</b>                                   | 5152         | 2587                       | 2565                       |                |
| <b>Patients with respiratory cultures ordered</b>               | 1569 (8.2%)  | 607 (16.0%)                | 962 (6.2%)                 | p < 1e-15      |
| <b>Cultures ordered per patient</b>                             | 3.3          | 4.3                        | 2.7                        | p < 1e-14      |
| <b>Intubated patients with respiratory cultures ordered</b>     | 867 (57.5%)  | 451 (71.5%)                | 416 (47.4%)                | p < 1e-15      |
| <b>Non-intubated patients with respiratory cultures ordered</b> | 792 (4.4%)   | 195 (6.1%)                 | 597 (4.1%)                 | p < 1e-5       |

289 **Table 3: Respiratory Culture Positivity**

| <b>Metric</b>                                                                                              | <b>Total</b>    | <b>SARS-CoV-2 Positive</b> | <b>SARS-CoV-2 Negative</b> | <b>p-value</b> |
|------------------------------------------------------------------------------------------------------------|-----------------|----------------------------|----------------------------|----------------|
| <b>Total Patients</b>                                                                                      | 19219           | 3796                       | 15423                      |                |
| <b>Intubated Patients</b>                                                                                  | 1509<br>(7.9%)  | 631<br>(16.6%)             | 878<br>(5.7%)              |                |
| <b>Patients who had abnormal respiratory cultures</b>                                                      | 572 (3.0%)      | 287 (7.6%)                 | 285 (1.8%)                 | p < 1e-15      |
| <b>% of patients with abnormal cultures among patients with cultures ordered</b>                           | 37.0%           | 46.8%                      | 30.9%                      | p < 1e-9       |
| <b>Cultures that resulted as abnormal</b>                                                                  | 1554<br>(30.2%) | 863 (33.4%)                | 691 (26.9%)                | p < 1e-6       |
| <b>Intubated patients with Ventilator-associated pneumonia (VAP) (%)</b>                                   | 403 (26.7%)     | 246 (39.0%)                | 157 (17.9%)                | p < 1e-15      |
| <b>% of intubated patients with respiratory cultures ordered and Ventilator-associated pneumonia (VAP)</b> | 57.4%           | 62.0%                      | 51.5%                      | p < 0.01       |
| <b>Non-intubated patients who had abnormal respiratory cultures (%)</b>                                    | 133 (0.7%)      | 24 (0.7%)                  | 109 (0.7%)                 | p = 1          |
| <b>% of non-intubated patients with respiratory cultures ordered that resulted as abnormal</b>             | 16.8%           | 12.3%                      | 18.3%                      | p = 0.069      |

290

291 **Table 4: Bacterial Pneumonia Categories**

| <b>Metric</b>                   | <b>Total</b> | <b>SARS-CoV-2 Positive</b> | <b>SARS-CoV-2 Negative</b> | <b>p-value</b> |
|---------------------------------|--------------|----------------------------|----------------------------|----------------|
| <b>Total Pneumonia Patients</b> | 572          | 287                        | 285                        |                |
| <b>Cases of CAP</b>             | 98 (17.1%)   | 35 (12.2%)                 | 63 (22.1%)                 | p < 0.01       |
| <b>Cases of HAP</b>             | 71 (12.4%)   | 6 (2.1%)                   | 65 (22.8%)                 | p < 1e-12      |
| <b>Cases of VAP</b>             | 403 (70.4%)  | 246 (85.7%)                | 157 (55.1%)                | p < 1e-14      |

292

293 **Figure Legends:**

294 **Figure 1: Respiratory culture ordering by COVID-19 status**

295 A) Percentage of patients with respiratory cultures ordered, by month and total. B) Average number of  
296 respiratory cultures ordered per patient. \*  $p < 0.05$ , \*\*  $p < 0.01$ , \*\*\*  $p < 0.001$ , ns = not significant.

297

298 **Figure 2. Abnormal respiratory culture rates by COVID-19 status.** Percentage of patients with  
299 abnormal respiratory cultures of those with any respiratory culture ordered. \*\*\*  $p < 0.001$

300

301 **Figure 3: Time from admission to respiratory culture positivity**

302 A) Percentage of total COVID-19 or non-COVID patients with abnormal respiratory culture grouped by  
303 time interval from admission to respiratory culture ordering comparing community acquired pneumonia  
304 (CAP, <48hrs) to hospital-acquired (HAP) or ventilator-associated pneumonia (VAP). B) Percentage of  
305 total COVID-19 or non-COVID patients with abnormal respiratory culture who fit criteria for CAP, HAP  
306 or VAP [8]. \*  $p < 0.05$ , \*\*  $p < 0.01$ , \*\*\*  $p < 0.001$

307

308 **Figure 4: Bacterial species identified in abnormal respiratory cultures in COVID-19 positive vs.**  
309 **negative patients.** Percent of total patients in each category of COVID-19 status with the 10 most  
310 common species for COVID-19 patients in descending order. \*  $p < 0.05$ , \*\*  $p < 0.01$ , \*\*\*  $p < 0.001$

311

312 **Supplementary Figure 1: Percentage of hospitalized patients with new positive SARS-CoV-2 PCR**  
313 **tests per month during 2020.** Based on the number of first-time positive SARS-CoV-2 PCR per month,  
314 relative to total patients tested in that month. Tests recorded in the data base began on March 10, 2020.

315

316 **Supplementary Figure 2: Rates of Respiratory Culture Ordering and Positivity in Intubated**

317 **Patients.** A) Percentage of overall patients by COVID-19 status who are intubated. B) Percent of patients  
318 with respiratory cultures ordered who are intubated or non-intubated by COVID-19 status. C) Percent of

319 patients with abnormal respiratory culture results who are intubated or non-intubated by COVID-19  
320 status. D) Percentage of intubated, non-intubated or overall hospitalized patients who have respiratory  
321 cultures ordered by COVID-19 status. E) Percent of intubated, non-intubated or overall hospitalized  
322 patients with abnormal respiratory culture results out of the total number with cultures ordered by  
323 COVID-19 status. For intubated patients, only those respiratory cultures collected more than 48 hours  
324 after intubation were included. F) Percent of intubated or overall hospitalized patients with abnormal  
325 respiratory cultures out of total patients by COVID-19 status. For intubated patients, only those  
326 respiratory cultures collected more than 48 hours after intubation were included. \*  $p < 0.05$ , \*\*  $p < 0.01$ ,  
327 \*\*\*  $p < 0.001$

328  
329 **Supplementary Figure 3: Rates of antibiotic resistance by category.** Percentage of overall cultures with  
330 each type of resistance. Penicillin class includes penicillin-like beta lactams: penicillin, oxacillin and  
331 ampicillin; Cephalosporins include ceftriaxone and ceftazidime. \*  $p < 0.05$

332

333

# Figure 1

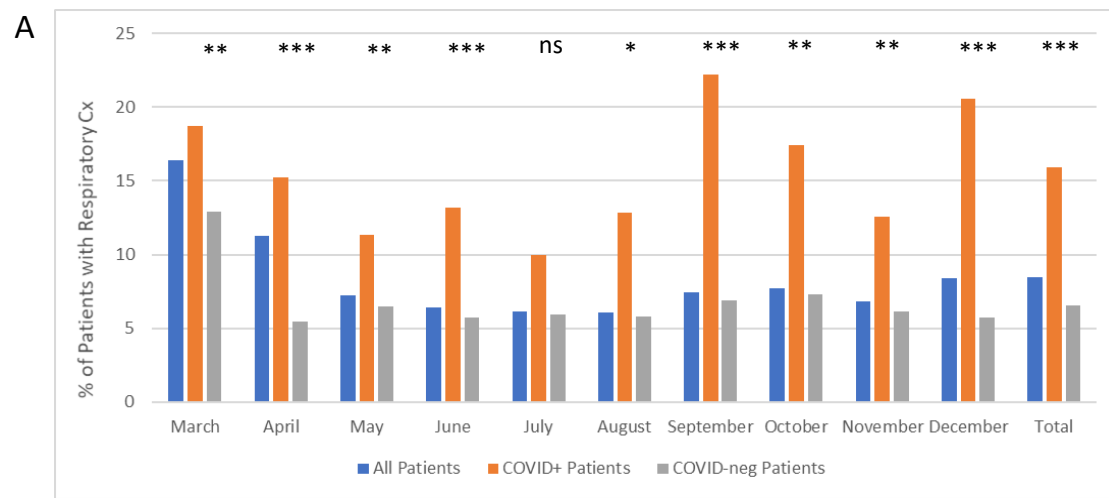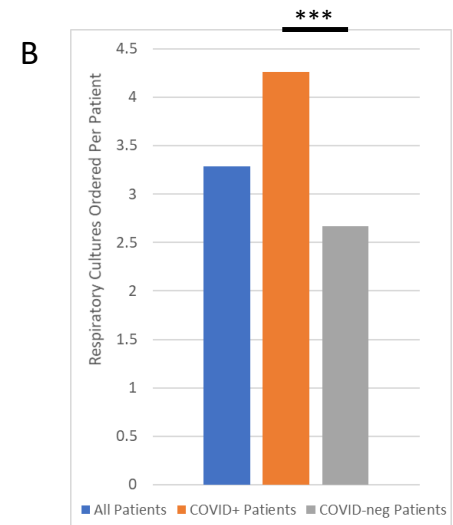

\*\*\*



# Figure 2

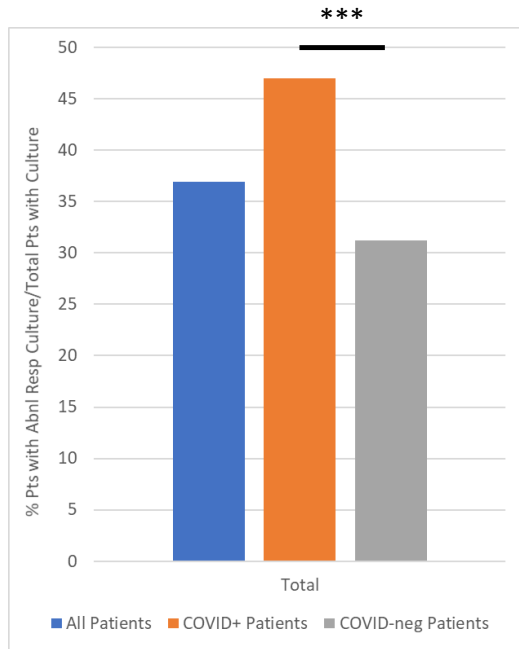

# Figure 3

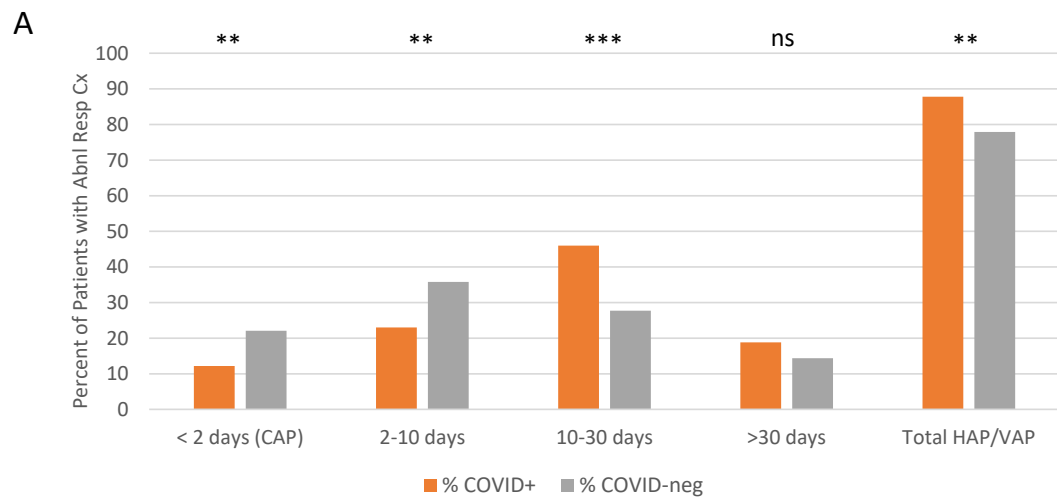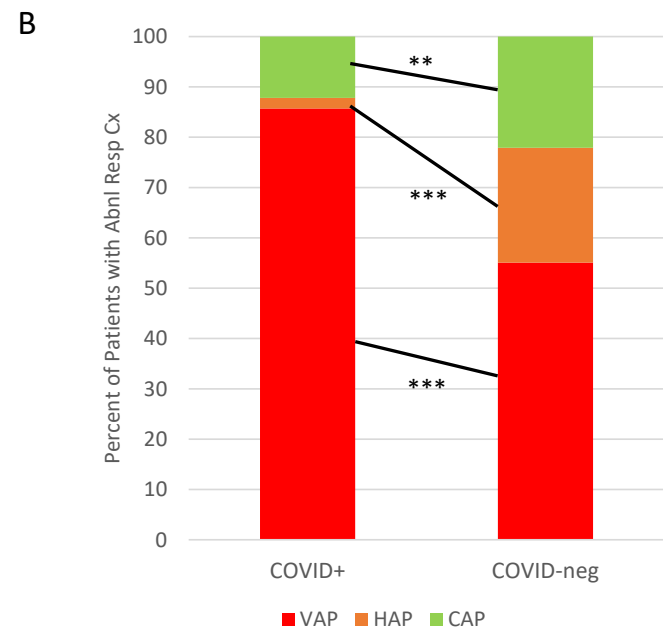

Figure 4

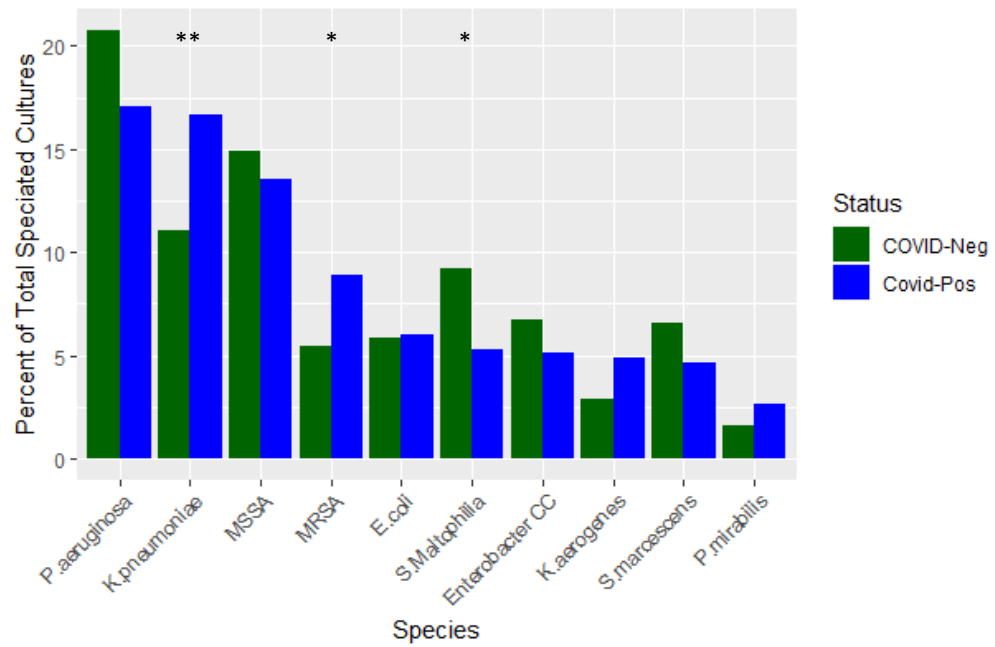

Source: http://medrxiv.org/content/10.1101/2022.02.08.22270591v1.full.pdf
